# Supplementary material
Source: publisher figshare collection journal article supplement (https://frontiersin.figshare.com/ndownloader/files/28364535)
Supplement: Supplementary file 1 [file 28364535]

## Sheet: Table S1
Table S1. Sex ratio bias in F1 pupae from intra-species and inter-species crosses.
Intra-species
Crosses (30±1♀ × 15±1♂)	Cross #	Bloodfeeding #	No. of females	No. of males	Sex ratio(♀/♂)	Binomial two-tail P-value	Bonferroni-corrected P-value
♀An. merus × ♂An. merus	1	1	59	54	1.09	0.7069	0.00714286
	1	2	130	117	1.11	0.4452
	2	1	137	130	1.05385	0.7135
	2	2	51	52	0.980769	1
	3	1	83	88	0.943182	0.7598
	3	2	105	118	0.889831	0.4217
	3	3	62	77	0.805195	0.2349
♀An. coluzzii MOPTI × ♂An. coluzzii MOPTI	1	1	219	298	0.73	0.0007	0.0166667
	1	2	274	263	1.04	0.6661
	2	1	246	265	0.93	0.4259
♀An. coluzzii MALI × ♂An. coluzzii MALI	1	1	196	245	0.8	0.0222	0.025
	1	2	120	137	0.875912	0.3183
♀An. gambiae ZANU × ♂An. gambiae ZANU	1	1	100	103	0.970874	0.8884	0.0166667
	1	2	84	94	0.893617	0.5001
	1	3	24	33	0.727273	0.2892
Inter-species
Crosses (30±1♀× 15±1♂)	Cross #	Bloodfeeding #	No. of females	No. of males	Sex ratio(♀/♂)	Binomial two-tail P-value	Bonferroni-corrected P-value
♀ An. coluzzii MOPTI × ♂ An. merus	1	1	257	196	1.31122	0.0048	0.01
	1	2	131	104	1.25962	0.0897
	2	1	226	170	1.32941	0.0056
	2	2	181	148	1.22297	0.0775
	2	3	60	58	1.03448	0.9267
♀ An. coluzzii MALI × ♂ An. merus	1	1	266	189	1.40741	0.0004	0.0166667
	1	2	134	75	1.78667	< 0.0001
	2	1	132	113	1.16814	0.2501
♀ An. gambiae ZANU × ♂ An. merus	1	1	73	50	1.46	0.0469	0.01
	1	2	26	25	1.04	1.0000
	2	1	86	84	1.02381	0.9389
	2	2	90	78	1.15385	0.3961
	2	3	125	73	1.71233	0.0003
♀ An. merus × ♂ An. coluzzii MOPTI	1	1	180	168	1.07	0.5555	0.01
	1	2	101	120	0.84	0.2259
	2	1	148	191	0.774869	0.0224
	2	2	133	144	0.923611	0.548
	2	3	84	122	0.688525	0.0098
♀ An. merus × ♂ An. coluzzii MALI	1	1	24	27	0.888889	0.7798	0.00833333
	1	2	57	38	1.5	0.0642
	2	1	9	31	0.290323	0.0007
	3	1	118	168	0.7	0.0037
	3	2	137	143	0.95	0.7651
	3	3	50	92	0.54	0.0005
♀ An. merus × ♂ An. gambiae ZANU	1	1	62	76	0.815789	0.2684	0.00833333
	1	2	17	25	0.68	0.28
	1	3	59	111	0.531532	< 0.0001
	2	1	19	55	0.345455	< 0.0001
	2	2	26	59	0.440678	0.0004
	2	3	27	76	0.355263	< 0.0001
